# Supplementary material for: Layer by Layer Antimicrobial Coatings Based on Nafion, Lysozyme, and Chitosan
Source: PubMed Central journal article supplement (PMC6915488; doi:10.3390/nano9111563), 2019-11-04
Supplement: nanomaterials-09-01563-s001.pdf [file nanomaterials-09-01563-s001.pdf]

# Layer by Layer Antimicrobial Coatings Based on Nafion, Lysozyme and Chitosan

Ella N. Gibbons <sup>1</sup>, Charis Winder <sup>2</sup>, Elliot Barron <sup>2</sup>, Diogo Fernandes <sup>3</sup>, Marta J. Krysmann <sup>1,\*</sup>, Antonios Kelarakis <sup>2,\*</sup>, Adam V.S. Parry <sup>4</sup>, Stephen G. Yeates <sup>4</sup>

<sup>1</sup> School of Pharmacy and Biomedical Sciences, University of Central Lancashire, Preston PR12HE, U.K.

<sup>2</sup> UCLan Research Centre for Smart Materials, School of Physical Sciences and Computing, University of Central Lancashire, Preston PR12HE, U.K.

<sup>3</sup> Malvern Panalytical, Grovewood Road, Enigma Business Park, Malvern, Worcestershire WR14 1XZ, UK

<sup>4</sup> School of Chemistry, University of Manchester, Manchester M13 9PL.

\* Correspondence: akelarakis@uclan.ac.uk; mkrysmann@uclan.ac.uk

i

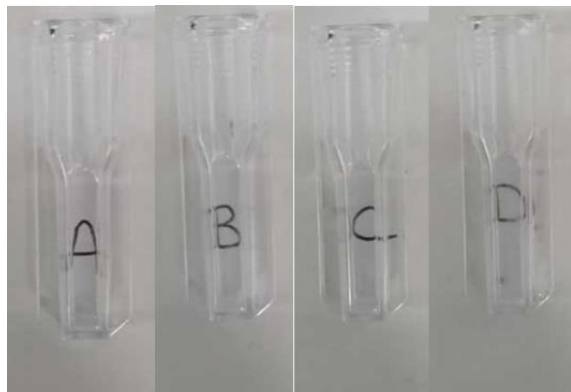

ii

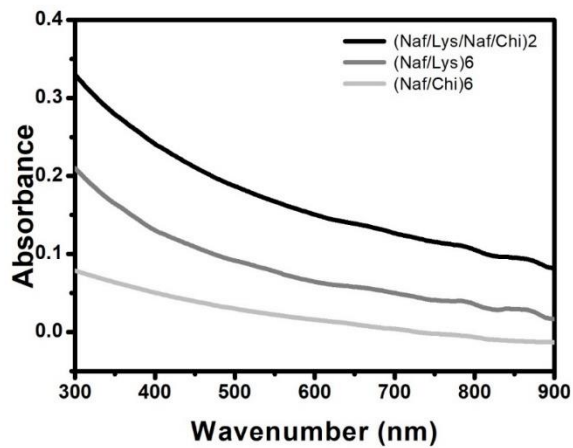

**Figure S1.** i) Photos of UV-vis polystyrene cuvettes: uncoated (A), (Naf/Lys)<sub>6</sub> (B), (Naf/Chi)<sub>6</sub> (C), (Naf/Lys/Naf/Chi)<sub>2</sub> (D), demonstrating their transparency levels. ii) UV-vis spectra of polystyrene cuvettes coated with (Naf/Lys)<sub>6</sub>, (Naf/Chi)<sub>6</sub>, and (Naf/Lys/Naf/Chi)<sub>2</sub>.

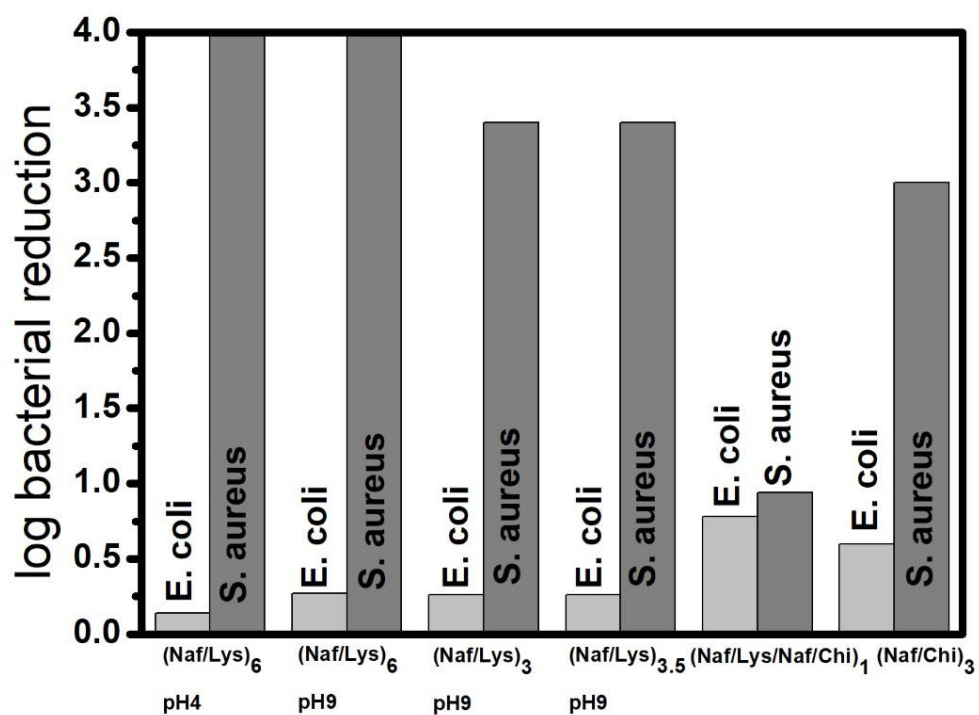

**Figure S2.** Reduction of the population of *E-coli* and *S. aureus* cultures exposed to QCM-D crystals coated with (Naf/Lys)<sub>6</sub> (pH=4), (Naf/Lys)<sub>6</sub> (pH=9), (Naf/Lys)<sub>3</sub> (pH=9), (Naf/Lys)<sub>3.5</sub> (pH=9), (Naf/Lys/Naf/Chi)<sub>1</sub> and (Naf/Chi)<sub>3</sub>.
